# Supplementary material for: A large accessory protein interactome is rewired across environments
Source: eLife journal article supplement (doi:10.7554/elife.62365), 2020-09-14
Supplement: supp [file elife-62365-supp-v1.zip]

Archive with 22 entries (22 files):
- elife_poa_e62365_Transparent_Reporting_File.docx
- elife_poa_e62365_Figure_1_figure_supplement_1.pdf
- elife_poa_e62365_Figure_1_figure_supplement_2.pdf
- elife_poa_e62365_Figure_1_figure_supplement_3.pdf
- elife_poa_e62365_Figure_1_figure_supplement_4.pdf
- elife_poa_e62365_Figure_1_figure_supplement_5.pdf
- elife_poa_e62365_Figure_3_figure_supplement_1.pdf
- elife_poa_e62365_Figure_3_figure_supplement_2.pdf
- elife_poa_e62365_Figure_3_figure_supplement_3.pdf
- elife_poa_e62365_Figure_3_figure_supplement_4.pdf
- elife_poa_e62365_Figure_3_figure_supplement_5.pdf
- elife_poa_e62365_Figure_3_figure_supplement_6.pdf
- elife_poa_e62365_Figure_4_figure_supplement_1.pdf
- elife_poa_e62365_Figure_4_figure_supplement_2.pdf
- elife_poa_e62365_Figure_4_figure_supplement_3.pdf
- elife_poa_e62365_Figure_4_figure_supplement_4.pdf
- elife_poa_e62365_Figure_4_figure_supplement_5.pdf
- elife_poa_e62365_Supplementary_file_1.xlsx
- elife_poa_e62365_Supplementary_file_2.xlsx
- elife_poa_e62365_Supplementary_file_3.xlsx
- elife_poa_e62365_Supplementary_file_4.xlsx
- elife_poa_e62365_Supplementary_file_5.xlsx
