# Supplementary material for: A large accessory protein interactome is rewired across environments
Source: eLife journal article supplement (doi:10.7554/elife.62365), 2020-09-14

**Hydroxyurea**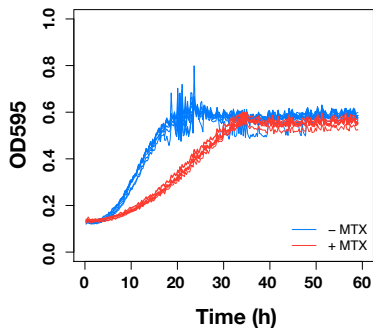**Forskolin**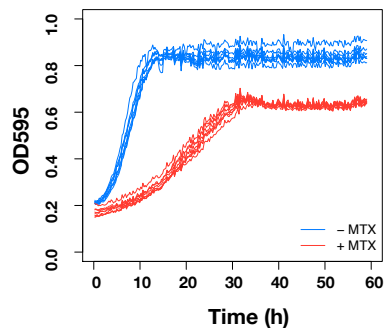**Raffinose**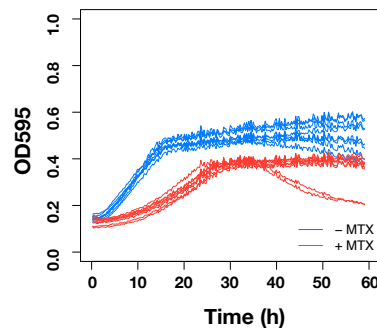**Doxorubicin**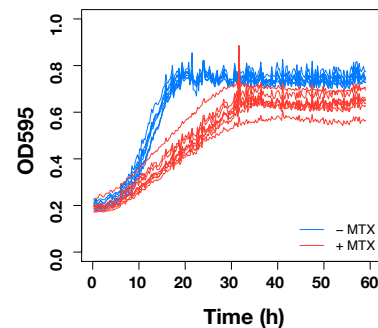**FK506**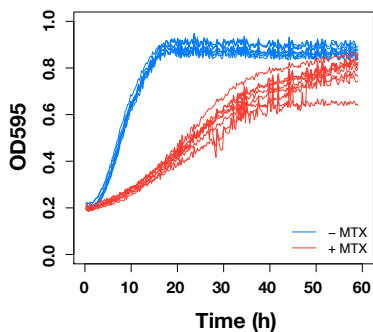**Rapamycin**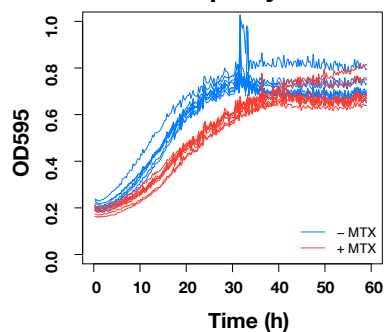**0.4 M NaCl**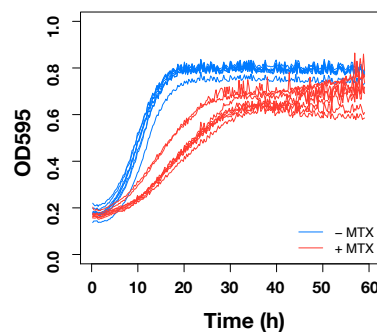**1 M NaCl**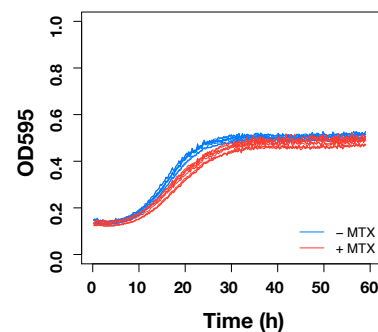**Ethanol + Glycerol**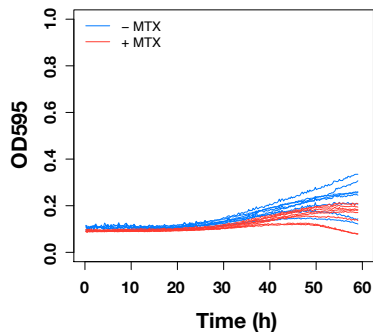**Leucine**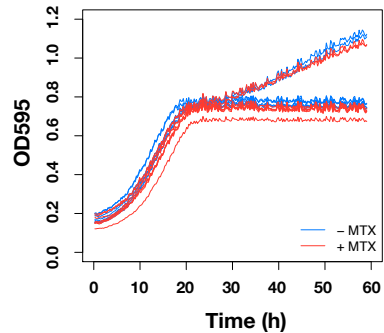**Methionine**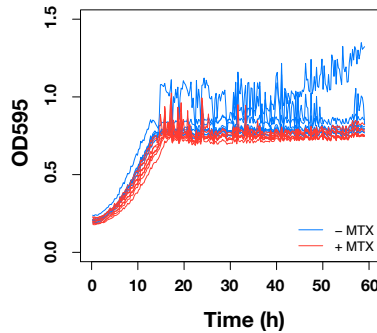

Supplement: supp [file elife-62365-supp-v1.zip › elife_poa_e62365_Figure_1_figure_supplement_5.pdf]
