# Supplementary material for: A large accessory protein interactome is rewired across environments
Source: eLife journal article supplement (doi:10.7554/elife.62365), 2020-09-14
Supplement: supp [file elife-62365-supp-v1.zip › elife_poa_e62365_Supplementary_file_1.xlsx]

## Sheet: Sheet1
Process	Number of F[1,2] strains retained	Number of F[1,2] strains lost (number of barcodes)	Number of F[3] strains retained (number of barcodes)	Number of F[3] strains lost (number of barcodes)
Picking from the PCA collection	1742	15	1130	5
Mating with two double barcoder strains	1742 (3484)	0	1116 (2232)	14 (28)
Sporulation and haploid selection	1741 (3481)	1 (3)	1113 (2222)	3 (10)
Replicating and pooling	1741 (3481)	0	1113 (2222)	0
