# Supplementary material for: A large accessory protein interactome is rewired across environments
Source: eLife journal article supplement (doi:10.7554/elife.62365), 2020-09-14
Supplement: supp [file elife-62365-supp-v1.zip › elife_poa_e62365_Supplementary_file_2.xlsx]

## Sheet: Sheet1
Name	Sequence	Use
oSL368	CGGGATCCATGGGCGGTGGCGGATCAGGAGG	Forward primer for amplifying linker-F[1,2] or linker-F[3]
oSL369	CGGGATCCATGGTTCGACCATTGAACTGCATCGTCG	Forward primer for amplifying F[1,2]
oSL370	CGGGATCCATGAGTAAAGTAGACATGGTTTGGATAGTCGGAGGCAG	Forward primer for amplifying F[3]
oSL373	CCGCTCGAGTCGACACTGGATGGCGGCGT	Reverse primer for amplifying linker-F[1,2], F[1,2], linker-F[3], or F[3]
oSL378	TATCCTCATAAGCAGCAATCAATTCTATCTATACTTTAAACATAGCTTCAAAATGTTTCTACTCCTTTTTTACTCTTCCA	Forward primer for amplifying DHFR fragment that was inserted into HO locus
oSL379	ACTTTTATTACATACAACTTTTTAAACTAATATACACATTTCGACACTGGATGGCGGCG	Reverse primer for amplifying DHFR fragment that was inserted into HO locus
