# Supplementary material for: A large accessory protein interactome is rewired across environments
Source: eLife journal article supplement (doi:10.7554/elife.62365), 2020-09-14
Supplement: supp [file elife-62365-supp-v1.zip › elife_poa_e62365_Supplementary_file_3.xlsx]

## Sheet: Sheet1
Strain	Genotype	Barcode
ySL235	MATa, ybr209w:: GalCre-Lox2272/66-Lox5171/66/71-Barcode1-5’URA3-KanMX-Lox5171, can1::MFApr1-HIS3-MF𝛂1pr-LEU2, Ho::TEF1 promoter-linker-DHFR[1,2]-NatMX, his3△1, leu2△0, ura3△0	TCCTGAATTATGAAACACGTTCTCGA
ySL236	MATa, ybr209w:: GalCre-Lox2272/66-Lox5171/66/71-Barcode2-5’URA3-KanMX-Lox5171, can1::MFApr1-HIS3-MF𝛂1pr-LEU2, Ho::TEF1 promoter-linker-DHFR[1,2]-NatMX, his3△1, leu2△0, ura3△0	GGTTCAACTAGCAATAGTCTTGCTTA
ySL237	MATa, ybr209w:: GalCre-Lox2272/66-Lox5171/66/71-Barcode1-5’URA3-KanMX-Lox5171, can1::MFApr1-HIS3-MF𝛂1pr-LEU2, Ho::TEF1 promoter-DHFR[1,2]-NatMX, his3△1, leu2△0, ura3△0	TCCTGAATTATGAAACACGTTCTCGA
ySL238	MATa, ybr209w:: GalCre-Lox2272/66-Lox5171/66/71-Barcode2-5’URA3-KanMX-Lox5171, can1::MFApr1-HIS3-MF𝛂1pr-LEU2, Ho::TEF1 promoter-DHFR[1,2]-NatMX, his3△1, leu2△0, ura3△0	GGTTCAACTAGCAATAGTCTTGCTTA
ySL239	MAT𝛂, ybr209w:: GalCre-Lox66/71-KanMX-3’URA3-Barcode1-LoxP-Lox2272/71, can1::MFApr1-HIS3-MF𝛂1pr-LEU2, Ho::TEF1 promoter-linker-DHFR[3]-HygMX, his3△1, leu2△0, ura3△0	TCCAGAAATACGTTACGGCTTAAGTT
ySL240	MAT𝛂, ybr209w:: GalCre-Lox66/71-KanMX-3’URA3-Barcode2-LoxP-Lox2272/71	CGGGCAATTTGCTTATCACTTGAAAT
ySL241	MAT𝛂, ybr209w:: GalCre-Lox66/71-KanMX-3’URA3-Barcode1-LoxP-Lox2272/71, can1::MFApr1-HIS3-MF𝛂1pr-LEU2, Ho::DHFR[3]-HygMX, his3△1, leu2△0, ura3△0	AGGGCAAGAGGATTCGATGTTCCACT
ySL242	MAT𝛂, ybr209w:: GalCre-Lox66/71-KanMX-3’URA3-Barcode2-LoxP-Lox2272/71	CATCCAAGGAGATTGACGATTAAGAT
