# Supplementary material for: A large accessory protein interactome is rewired across environments
Source: eLife journal article supplement (doi:10.7554/elife.62365), 2020-09-14
Supplement: supp [file elife-62365-supp-v1.zip › elife_poa_e62365_Supplementary_file_4.xlsx]

## Sheet: Sheet1
Strain Description	Estimated Number of Barcodes	Initial Barcode Frequency	Use
Diploid PPiSeq Library	7.5 x 106	1.3 x 10-7	PPI screening
DHFR-fragment controls (ORF x Null)	2.3 x 104	1.1 x 10-7	Filter promiscuous bait or prey, null distribution for PPI significance tests
DHFR+ controls	10	1 x 10-9	Normalize fitnesses across environments
DHFR- controls	100	1.3 x 10-6	Normalize fitnesses across environments
Positive Reference Set (PRS)	426	1.3 x 10-6	Benchmarking PPiSeq
Random Reference Set (RRS)	380	1.3 x 10-6	Benchmarking PPiSeq
