# Supplementary material for: A large accessory protein interactome is rewired across environments
Source: eLife journal article supplement (doi:10.7554/elife.62365), 2020-09-14
Supplement: supp [file elife-62365-supp-v1.zip › elife_poa_e62365_Supplementary_file_5.xlsx]

## Sheet: Sheet1
Laboratory condition
Condition	Component	Incubation Temperature	PPI detection
Synthetic Defined (SD)	1.7 g/L yeast nitrogen base (w/o amino acids and ammonium sulfate)	30 ℃	Yes
	72 mg/L histidine
	5 g/L ammonium sulfate
	360 mg/L leucine
	20 g/L glucose
	0.5 μg/mL methotrexate
Abiotic stress conditions
H2O2	SD + 0.001% H2O2	30 ℃	Yes
16 ℃	SD	16 ℃	Yes
37 ℃	SD	37 ℃	No
NaCI (0.4 M)	SD + 0.4 M NaCl	30 ℃	Yes
NaCI (1 M)	SD + 1 M NaCl	30 ℃	No
Addition of small molecules
Forskolin	SD + 20 μM forskolin	30 ℃	Yes
Doxorubicin	SD + 6 μM doxorubicin	30 ℃	Yes
Hydroxyurea	SD + 10 mM hydroxyurea	30 ℃	Yes
FK506	SD + 50 μM FK506	30 ℃	Yes
Rapamycin	SD + 200 nM rapamycin	30 ℃	No
Altered carbon or nitrogen
Raffinose	1.7 g/L yeast nitrogen base	30 ℃	Yes
	5 g/L ammonium sulfate
	72 mg/L histidine
	360 mg/L leucine
	20 g/L raffinose
3% ethanol and 3% glycerol	1.7 g/L yeast nitrogen base	30 ℃	No
	5 g/L ammonium sulfate
	72 mg/L histidine
	360 mg/L leucine
	3% ethanol
	3% glycerol
Methionine	1.7 g/L yeast nitrogen base 72 mg/L histidine	30 ℃	No
	360 mg/L leucine
	11.34 g/L methionine
	20 g/L glucose
Leucine	1.7 g/L yeast nitrogen base	30 ℃	No
	72 mg/L histidine
	10.32 g/L leucine
	20 g/L glucose
