# Supplementary figures and images for: A large accessory protein interactome is rewired across environments
Source: eLife journal article supplement (doi:10.7554/elife.62365), 2020-09-14

**A**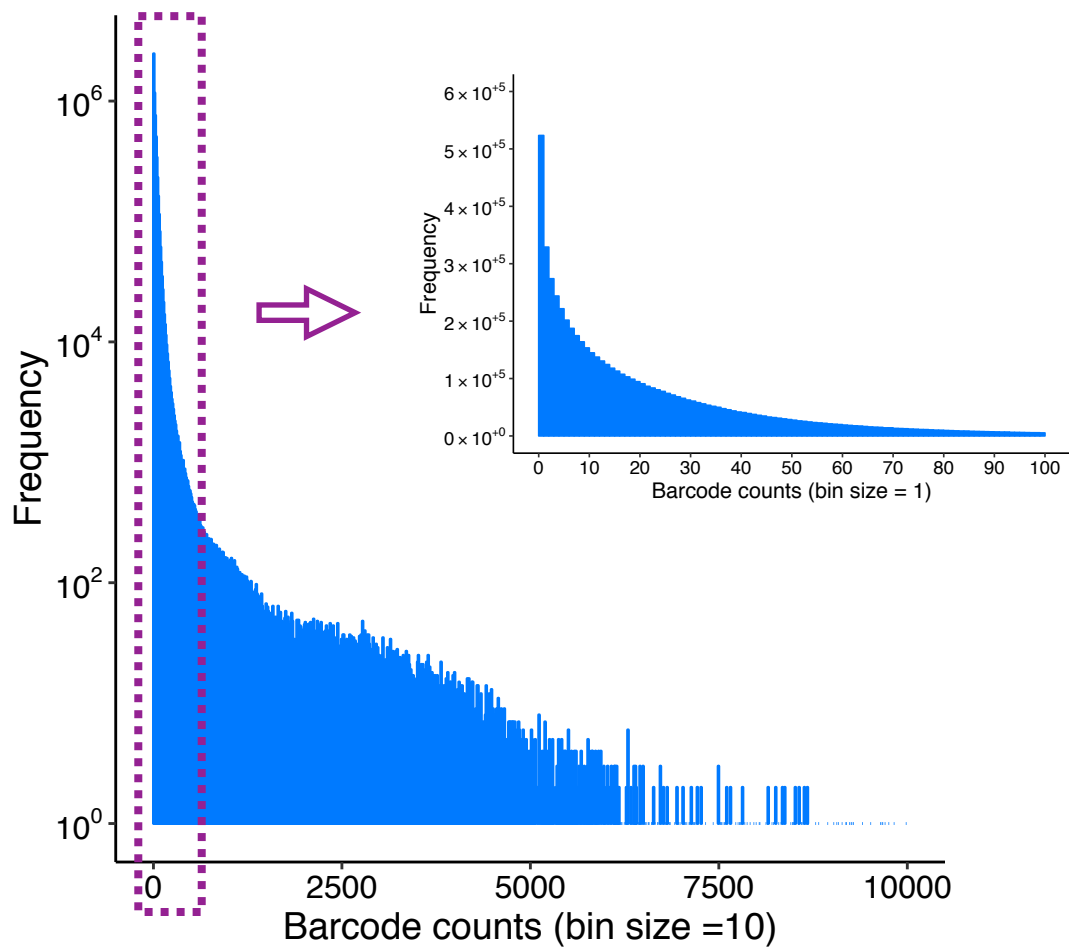**B**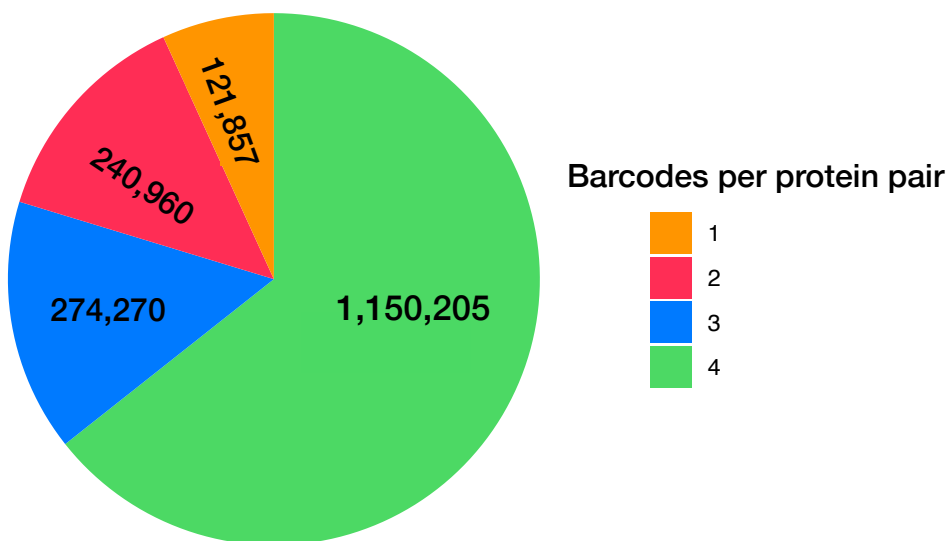

Supplement: supp [file elife-62365-supp-v1.zip › elife_poa_e62365_Figure_1_figure_supplement_1.pdf]

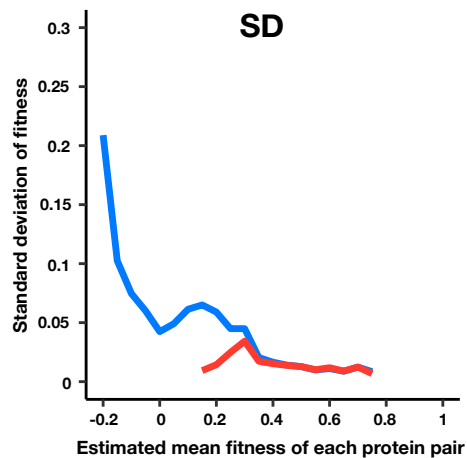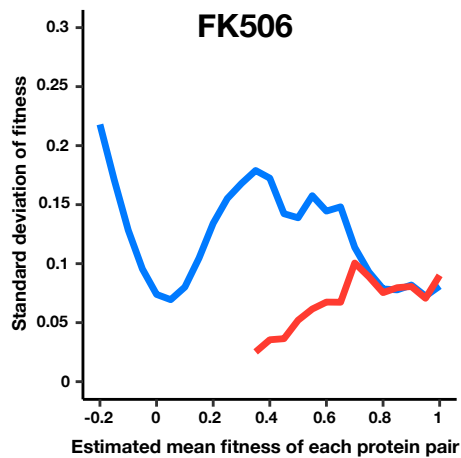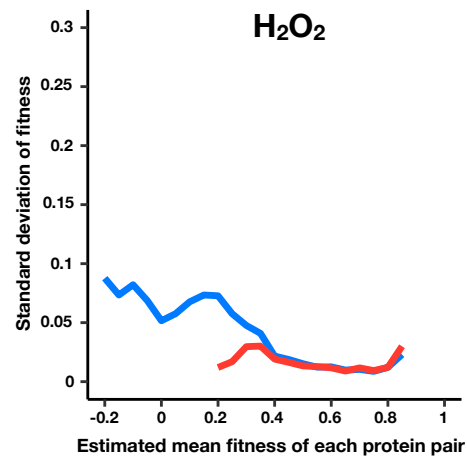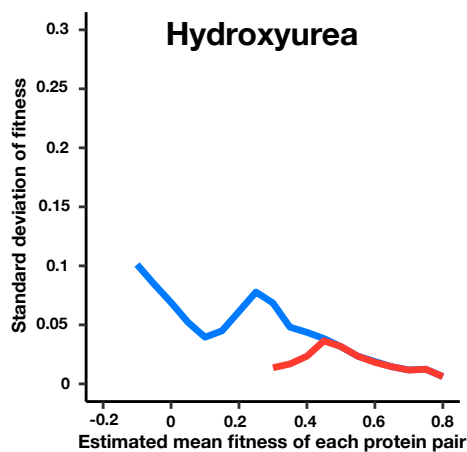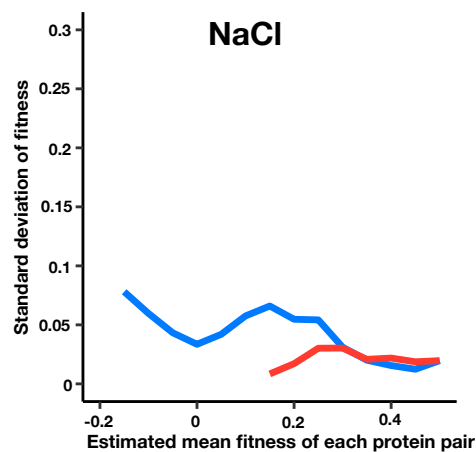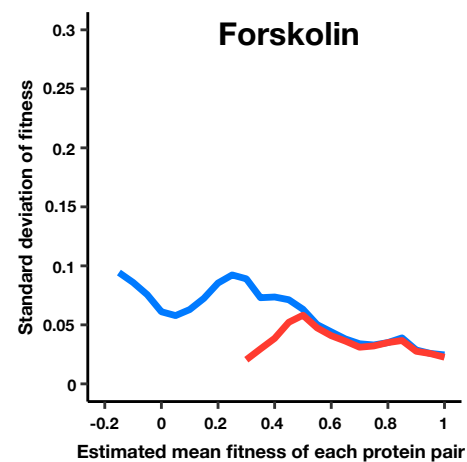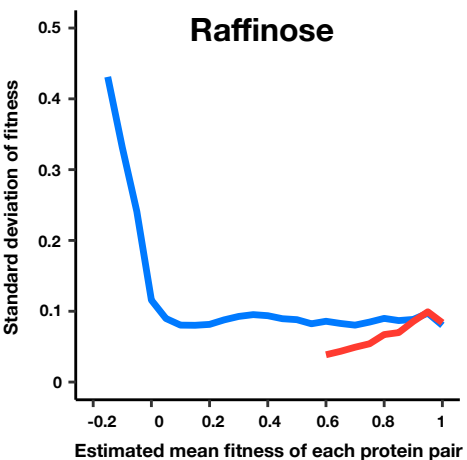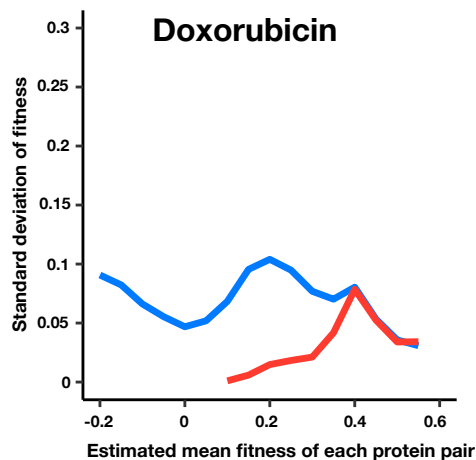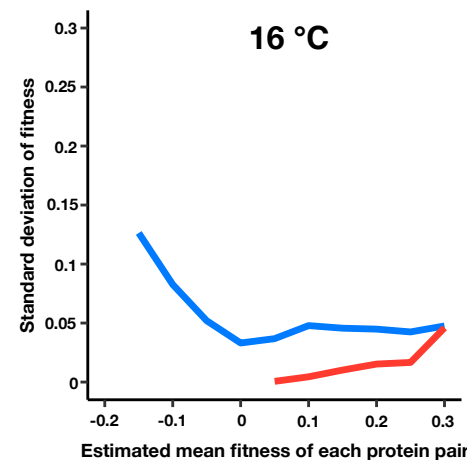

Supplement: supp [file elife-62365-supp-v1.zip › elife_poa_e62365_Figure_1_figure_supplement_2.pdf]

**SD**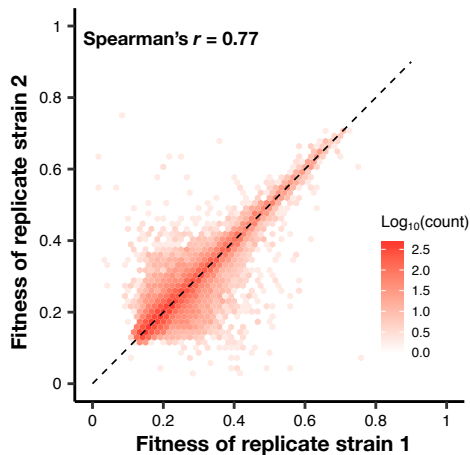**FK506**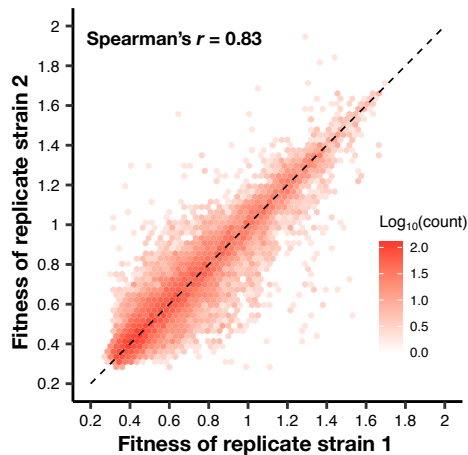**H<sub>2</sub>O<sub>2</sub>**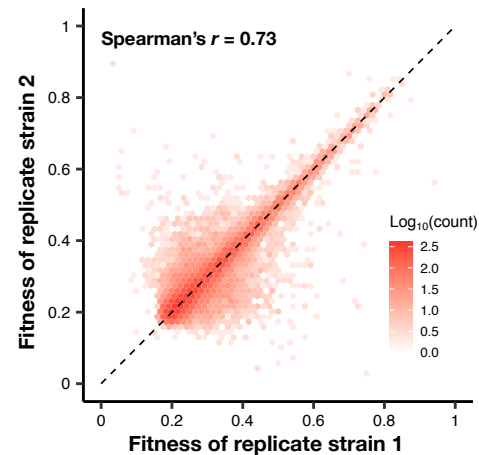**Hydroxyurea**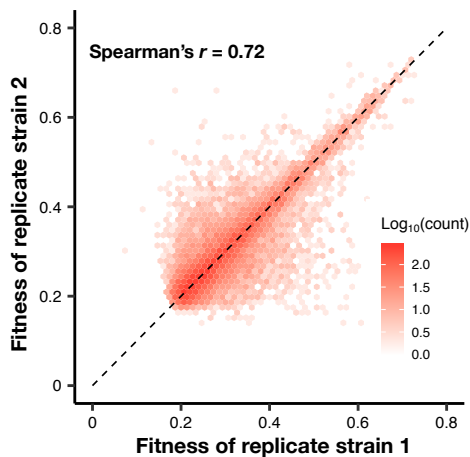**NaCl**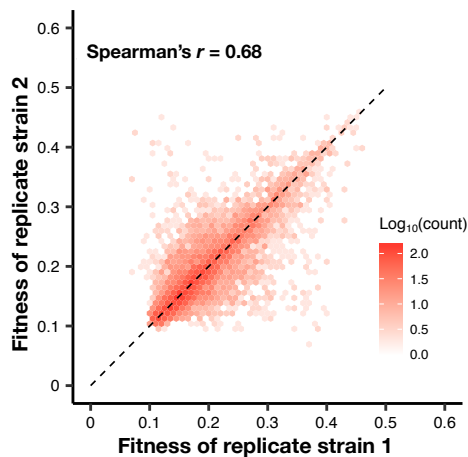**Forskolin**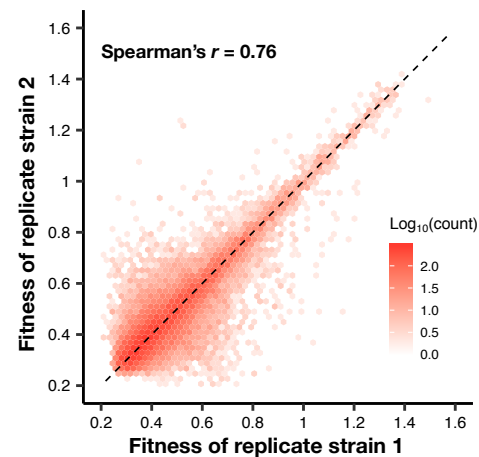**Raffinose**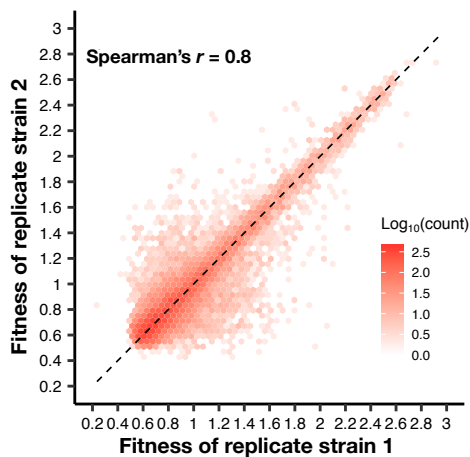**Doxorubicin**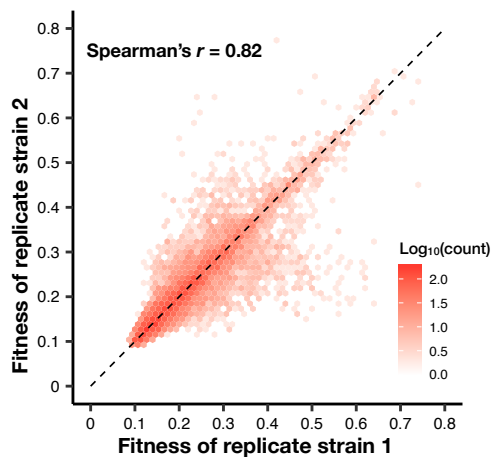**16 °C**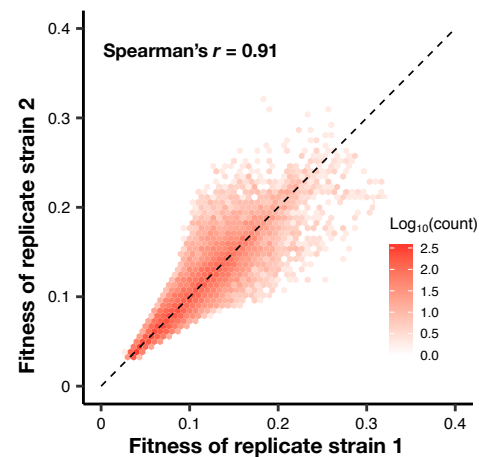

Supplement: supp [file elife-62365-supp-v1.zip › elife_poa_e62365_Figure_1_figure_supplement_3.pdf]

A

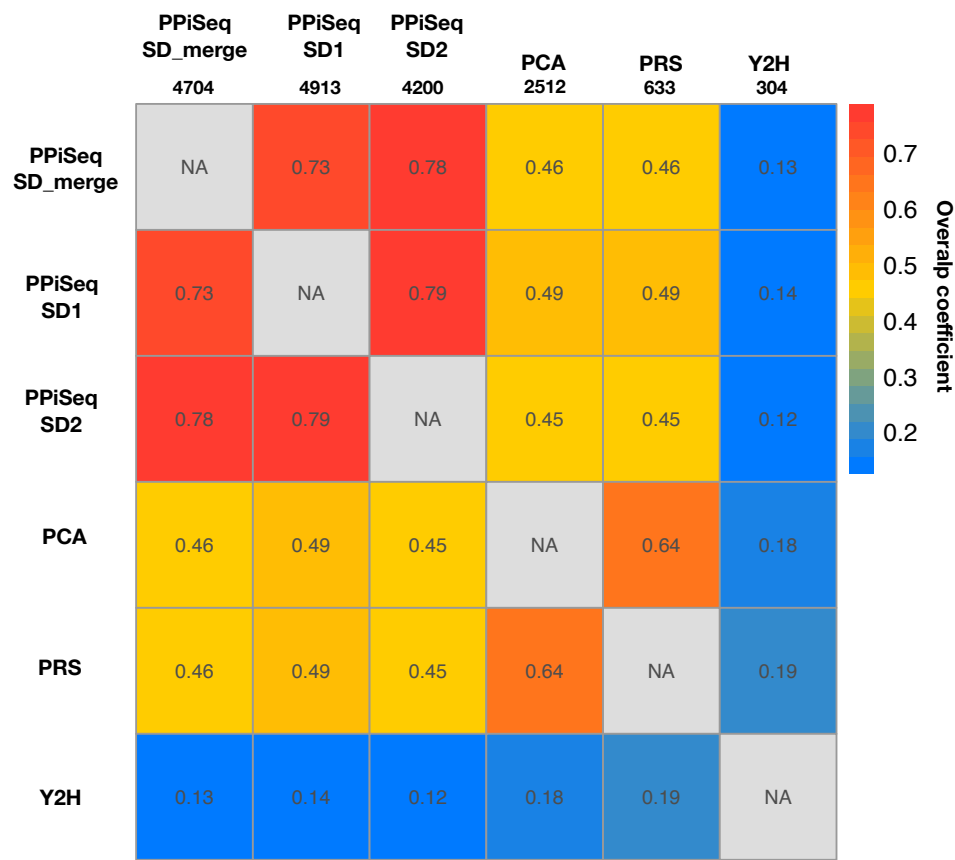

B

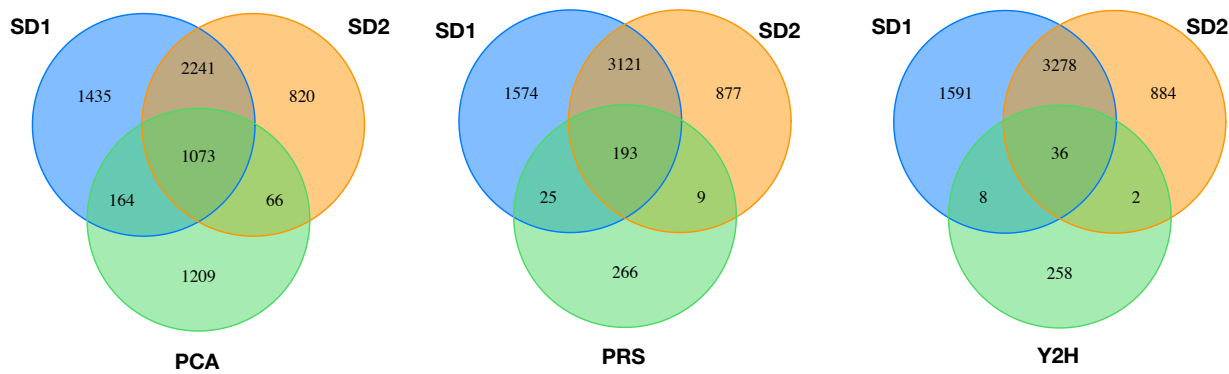

C

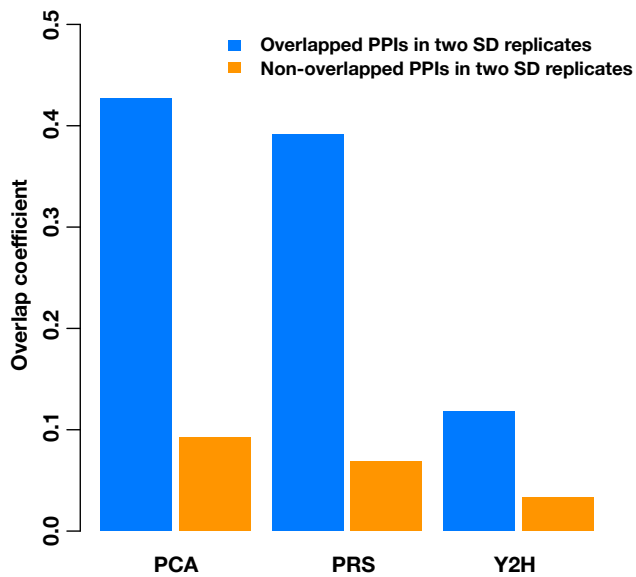

Supplement: supp [file elife-62365-supp-v1.zip › elife_poa_e62365_Figure_1_figure_supplement_4.pdf]

# A

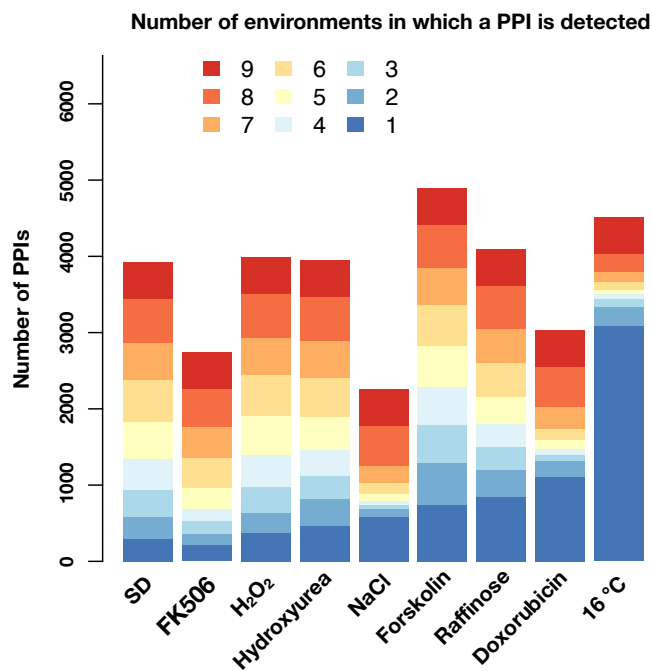

# B

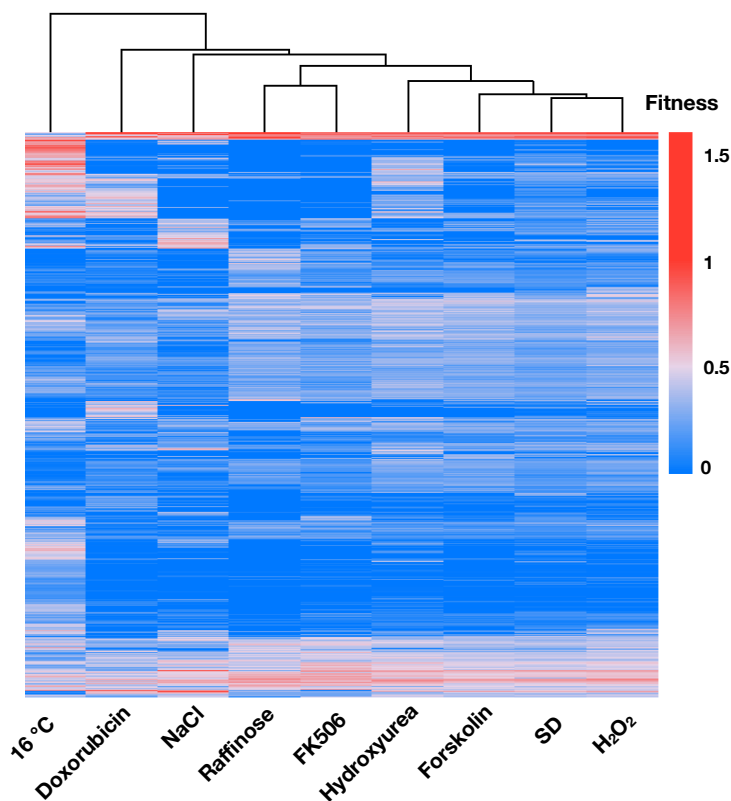

# C

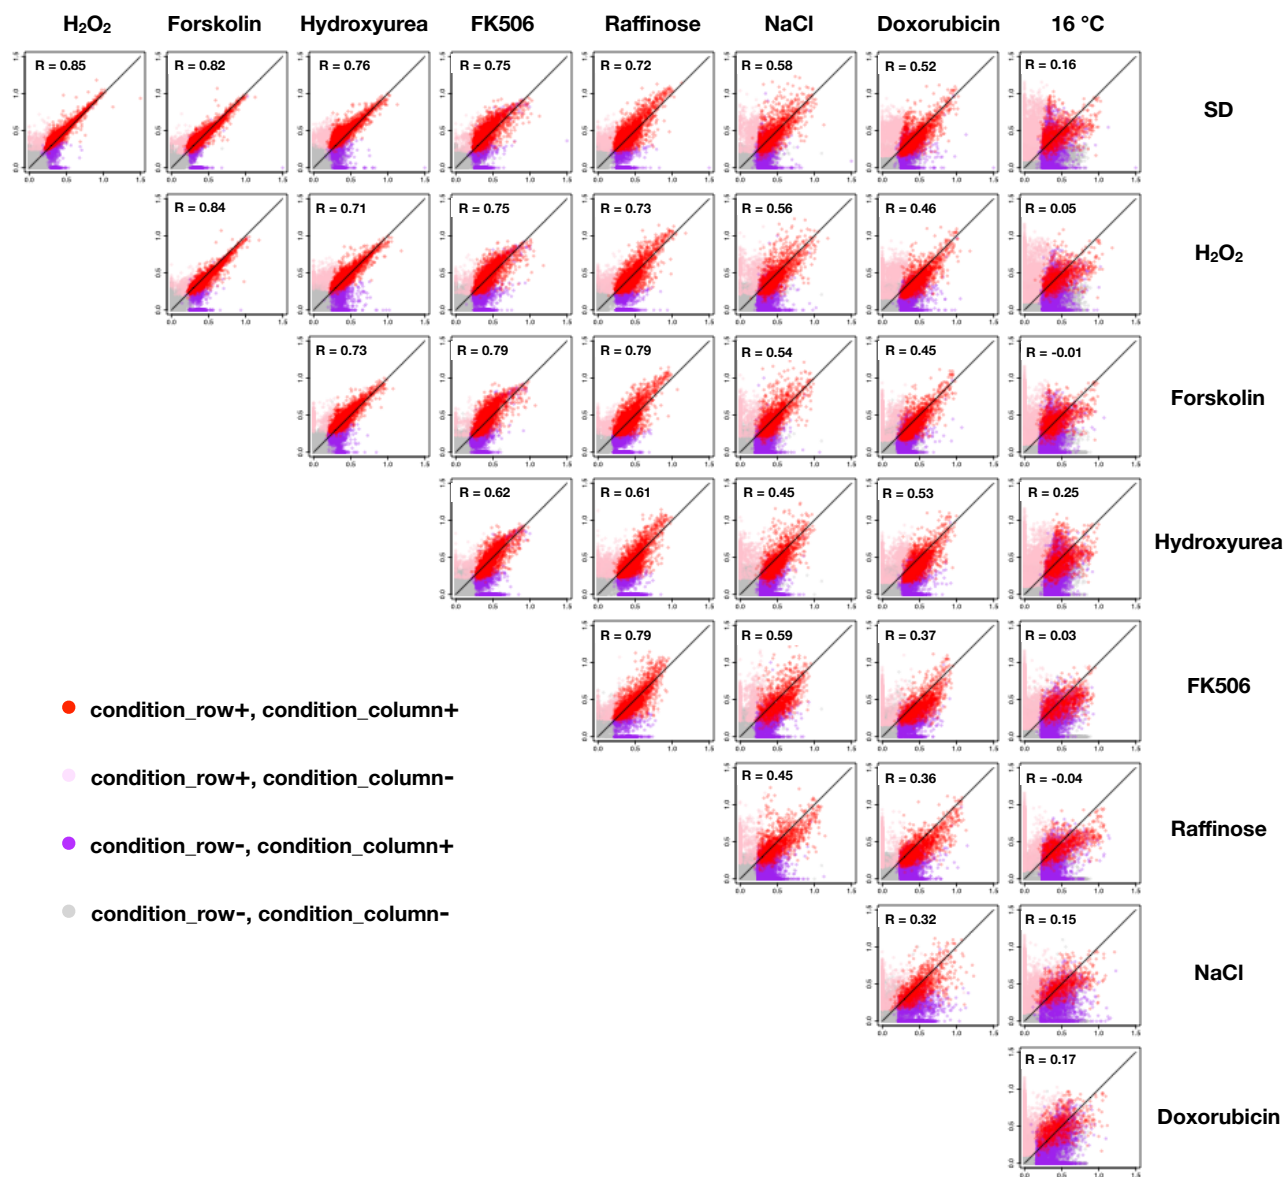

Supplement: supp [file elife-62365-supp-v1.zip › elife_poa_e62365_Figure_3_figure_supplement_1.pdf]

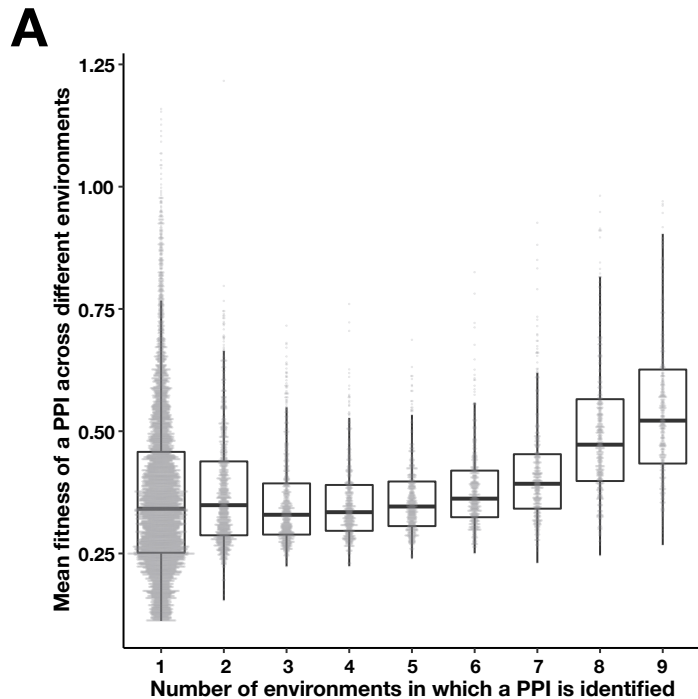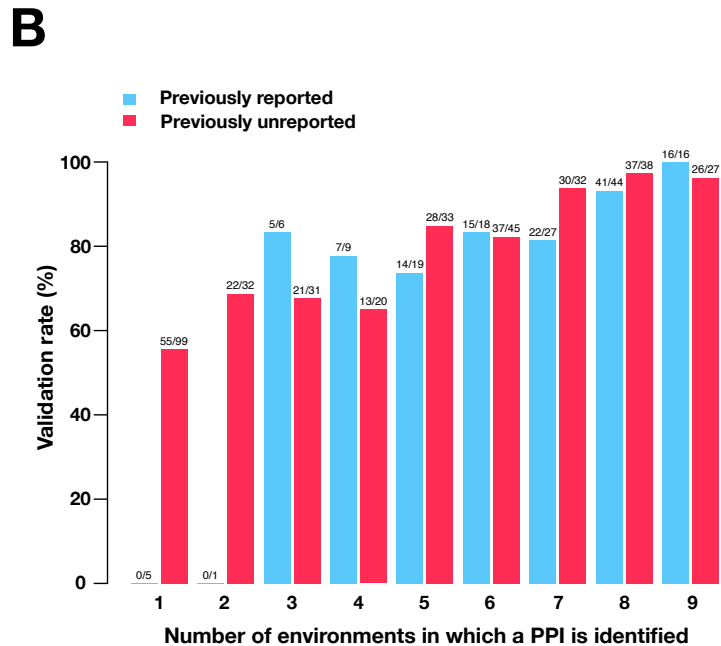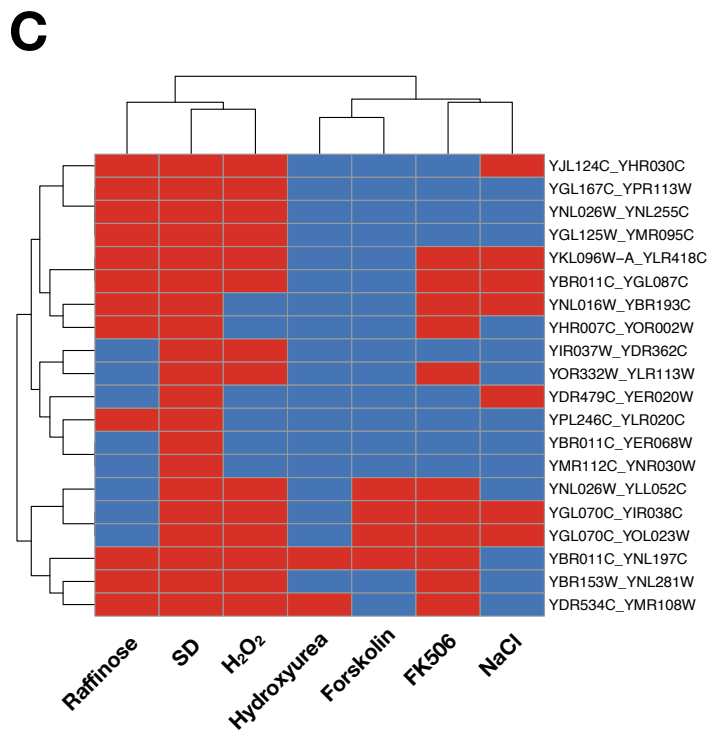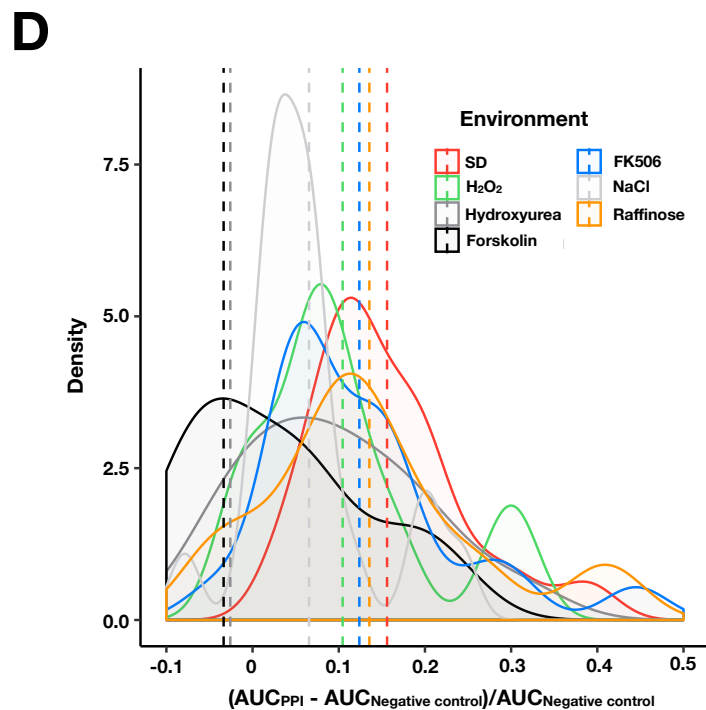

Supplement: supp [file elife-62365-supp-v1.zip › elife_poa_e62365_Figure_3_figure_supplement_2.pdf]

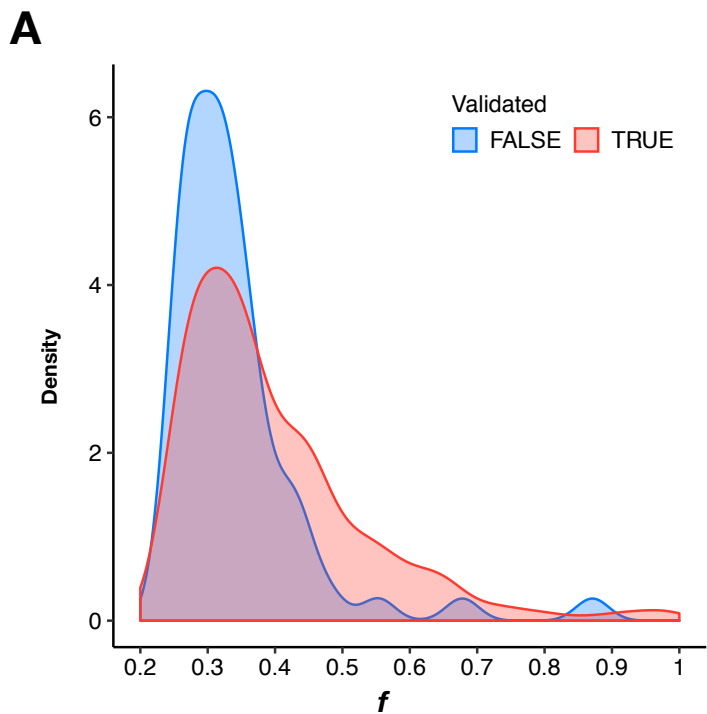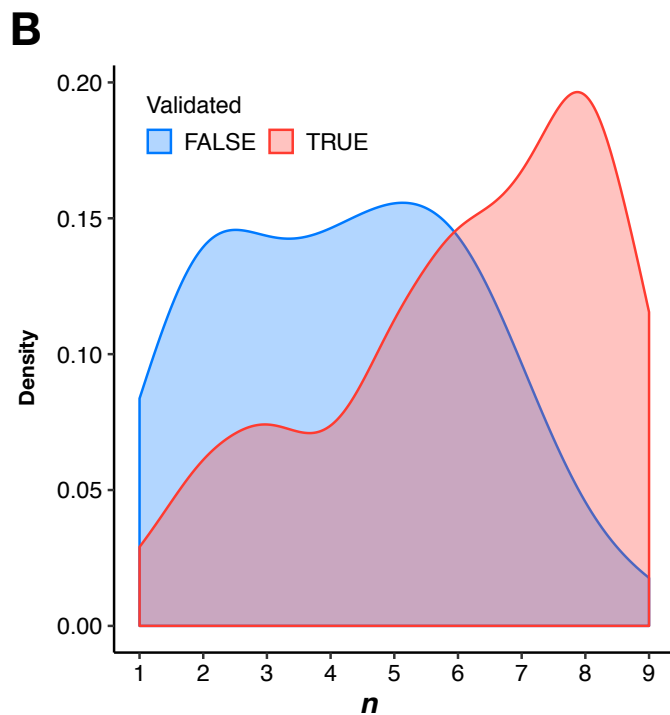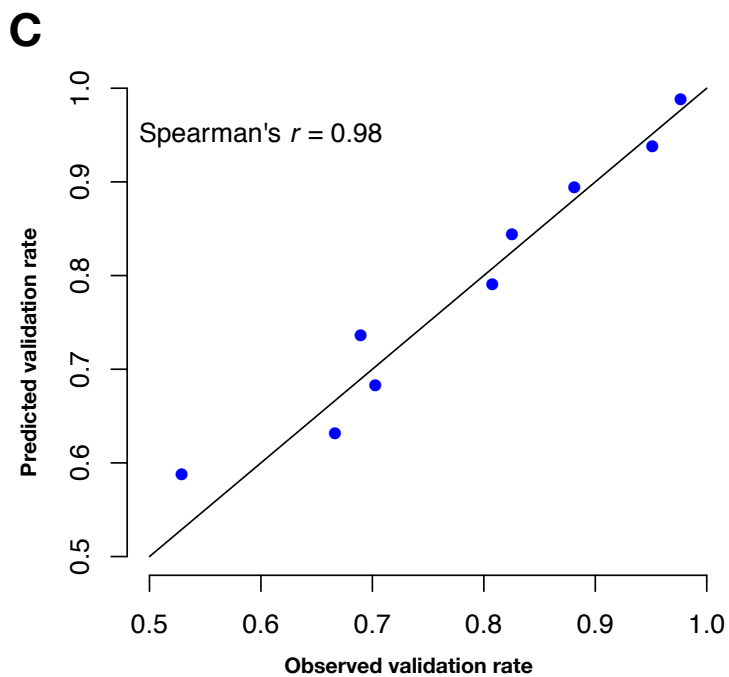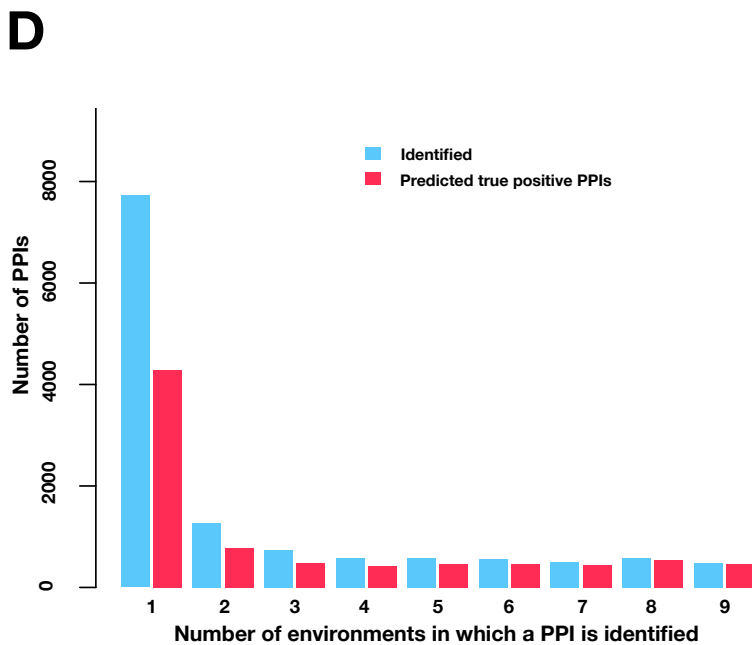

Supplement: supp [file elife-62365-supp-v1.zip › elife_poa_e62365_Figure_3_figure_supplement_3.pdf]

**A**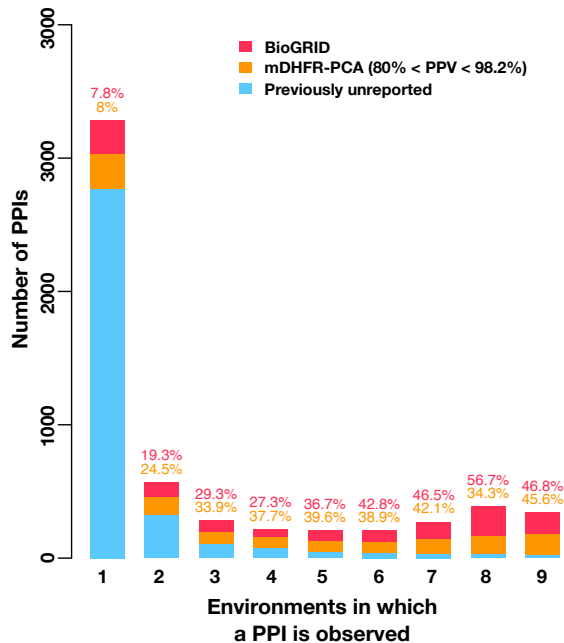**B**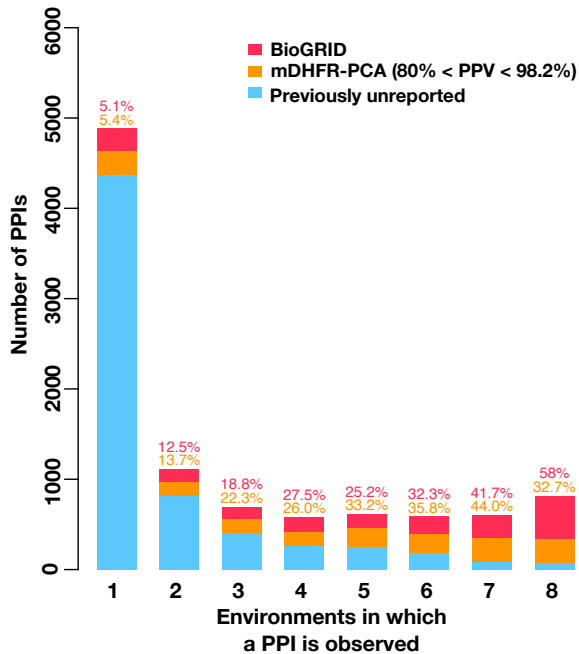

Supplement: supp [file elife-62365-supp-v1.zip › elife_poa_e62365_Figure_3_figure_supplement_4.pdf]

**A**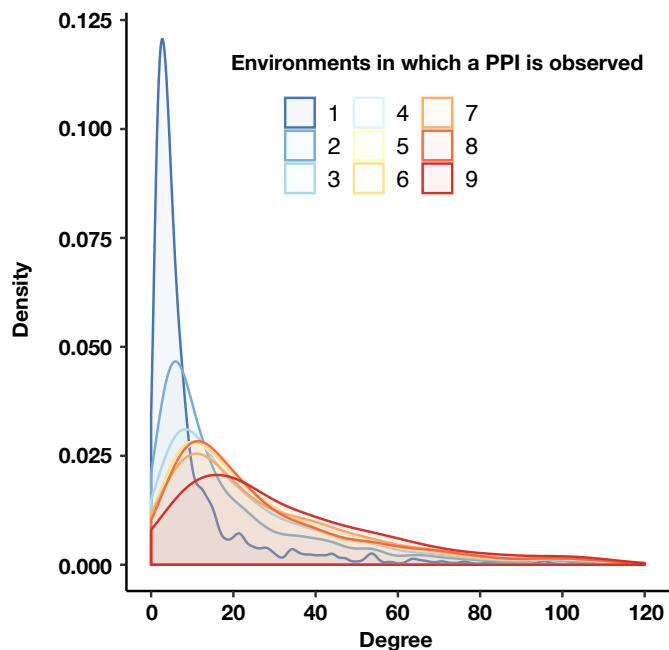**B**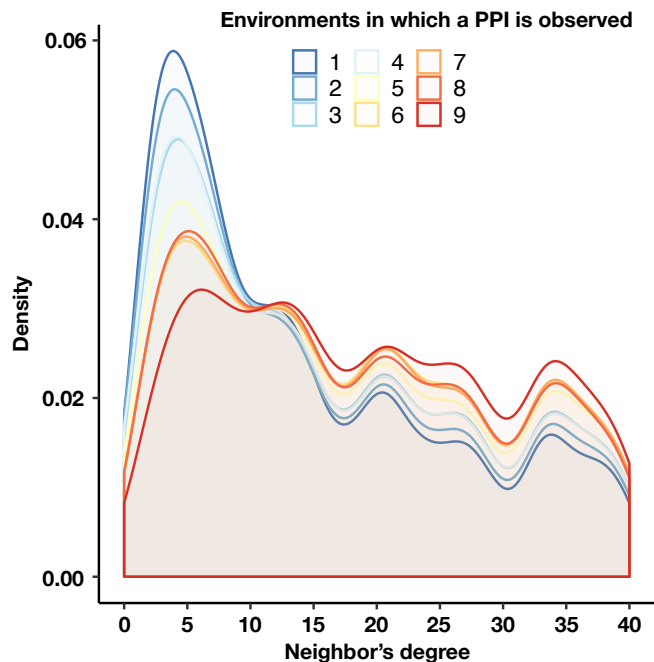**C**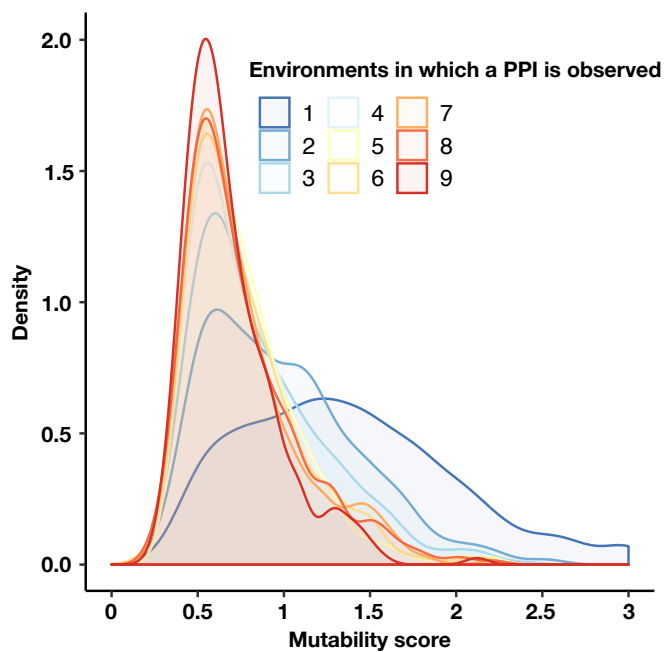**D**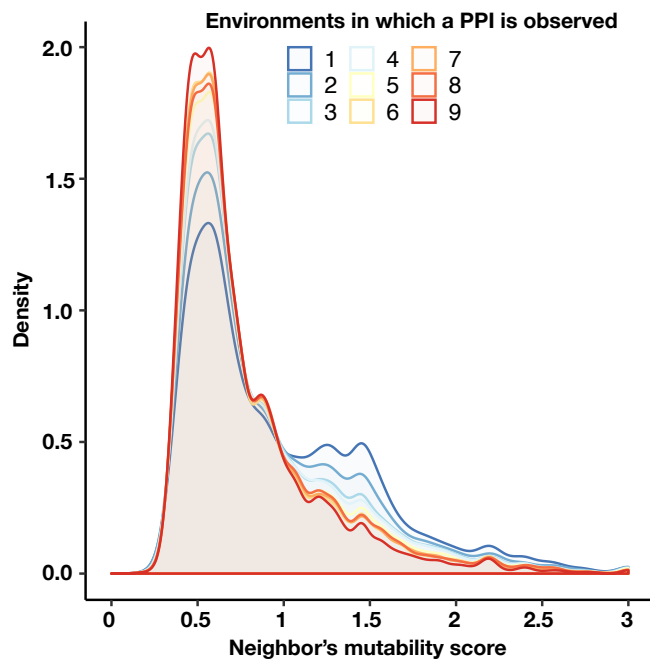

Supplement: supp [file elife-62365-supp-v1.zip › elife_poa_e62365_Figure_3_figure_supplement_5.pdf]

**A**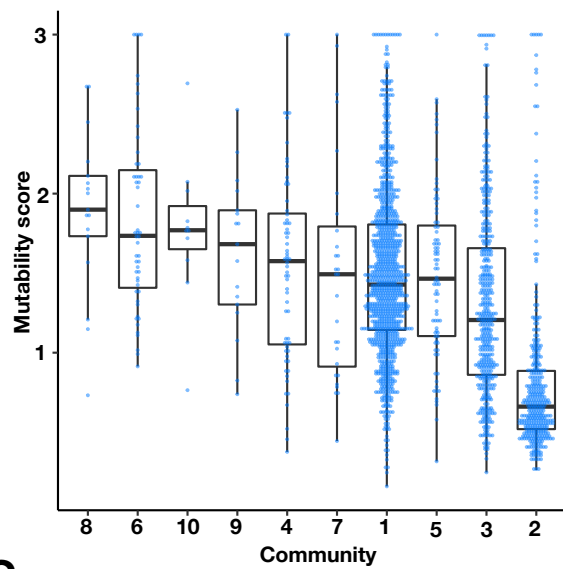**B**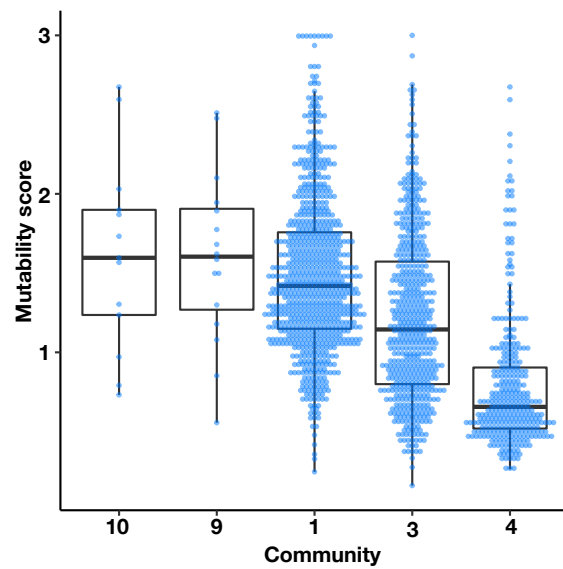**C**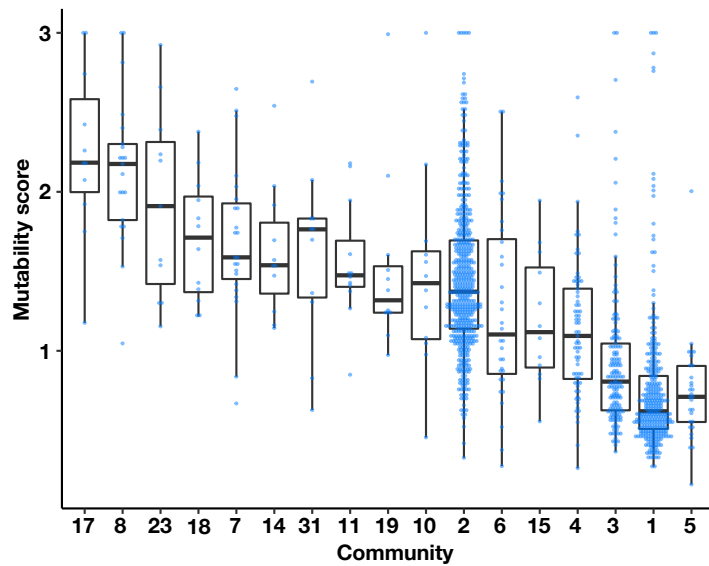

Supplement: supp [file elife-62365-supp-v1.zip › elife_poa_e62365_Figure_3_figure_supplement_6.pdf]

**SD**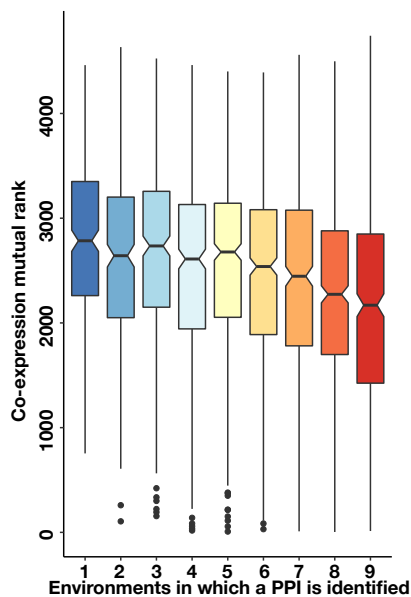**H<sub>2</sub>O<sub>2</sub>**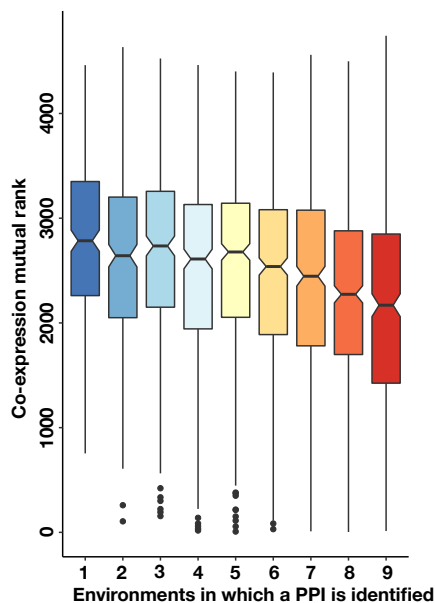**Hydroxyurea**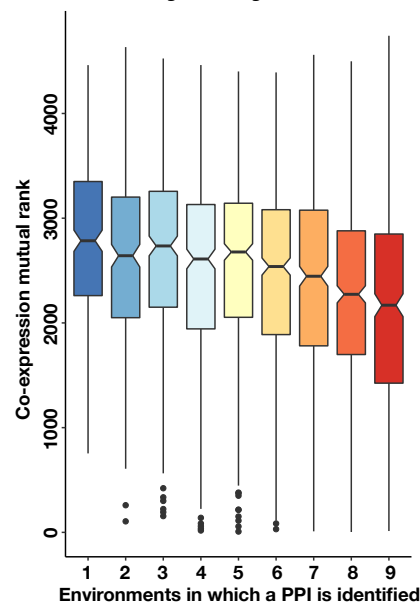**Forskolin**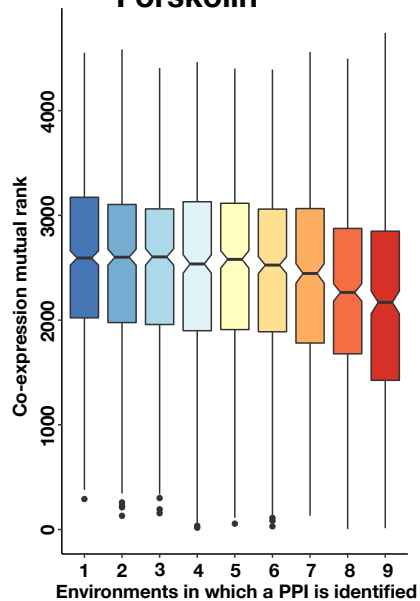**Doxorubicin**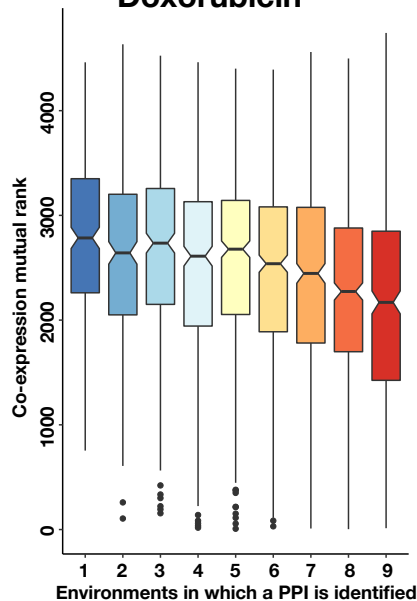**FK506**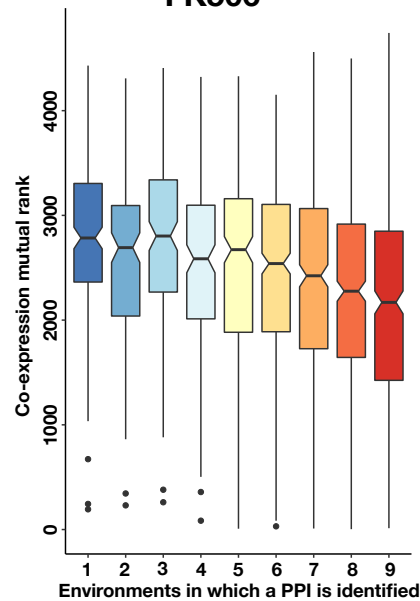**Raffinose**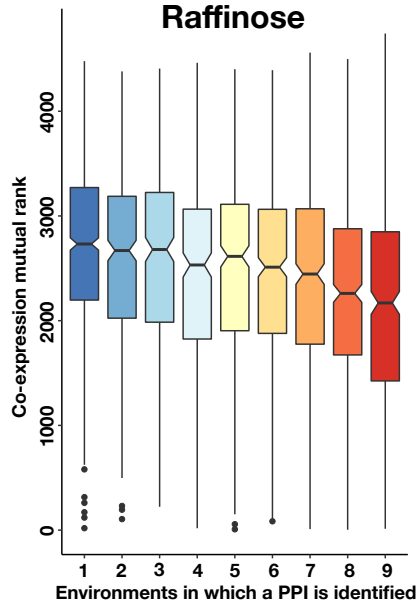**NaCl**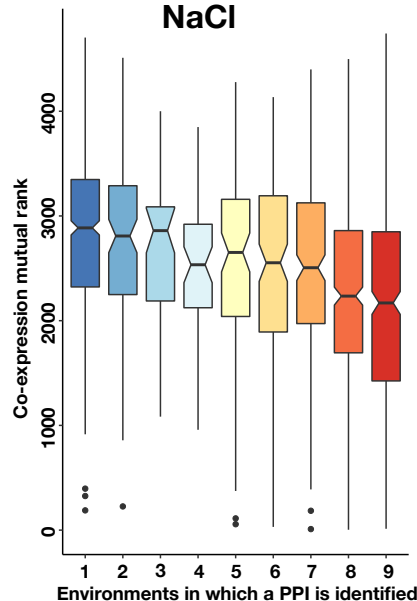**16 °C**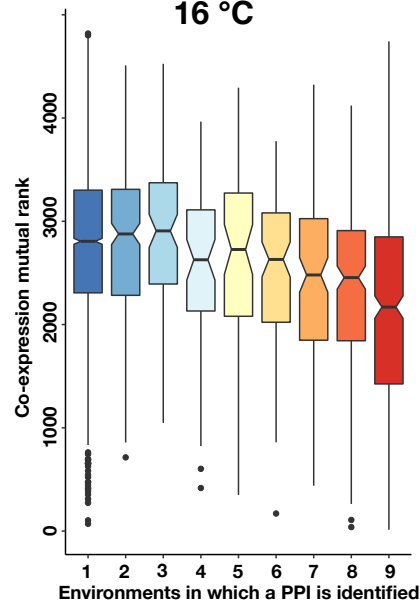

Supplement: supp [file elife-62365-supp-v1.zip › elife_poa_e62365_Figure_4_figure_supplement_1.pdf]

**A**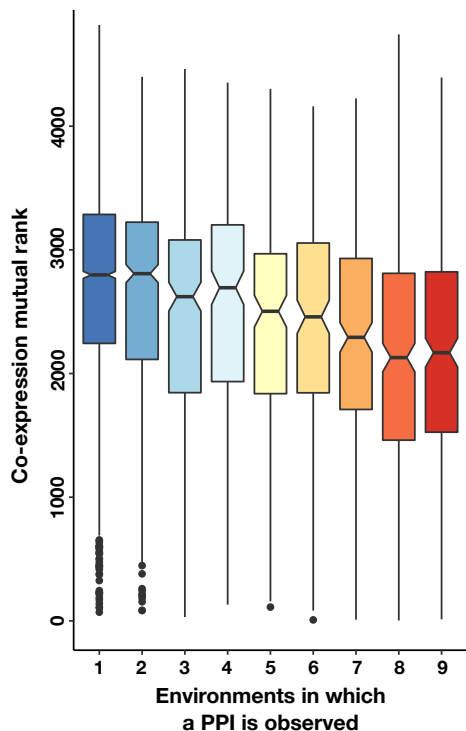**B**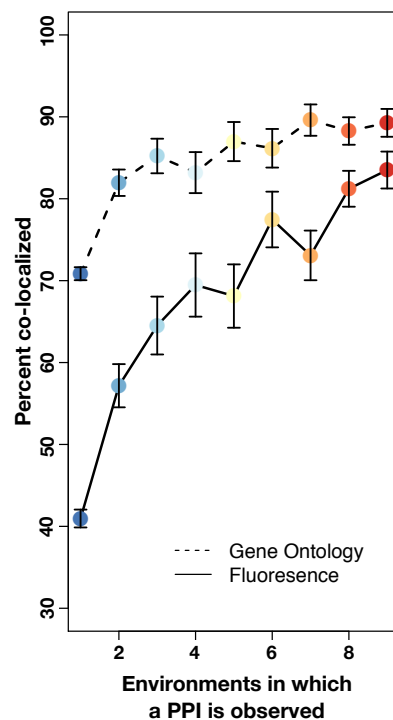**C**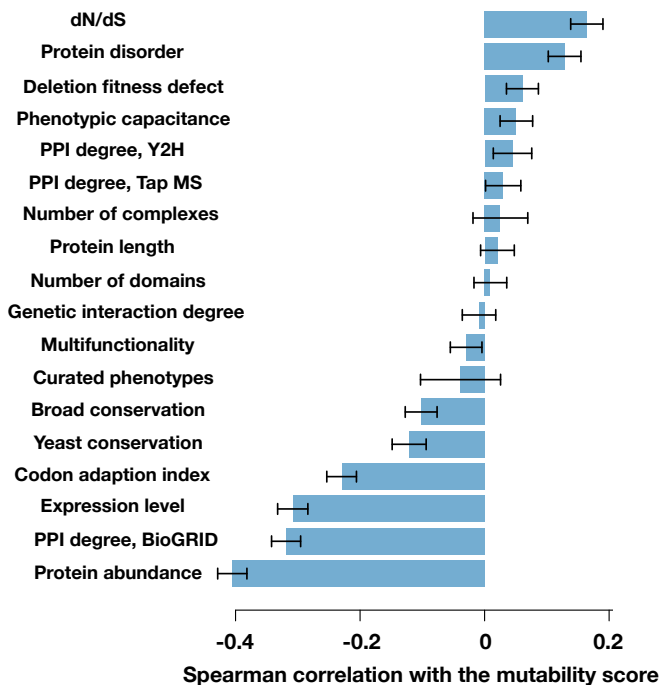**D**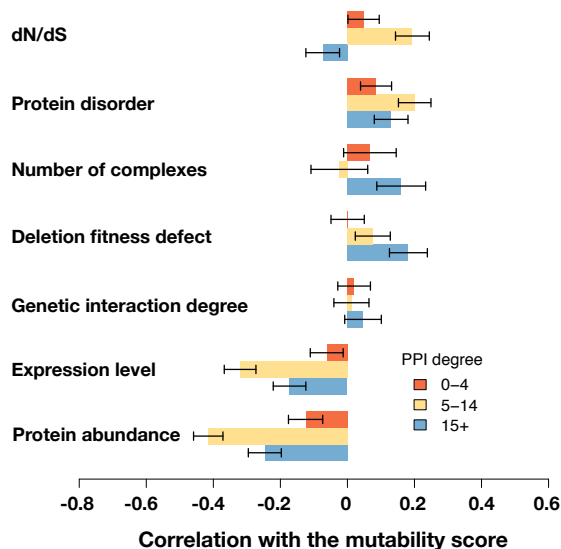

Supplement: supp [file elife-62365-supp-v1.zip › elife_poa_e62365_Figure_4_figure_supplement_2.pdf]

**A**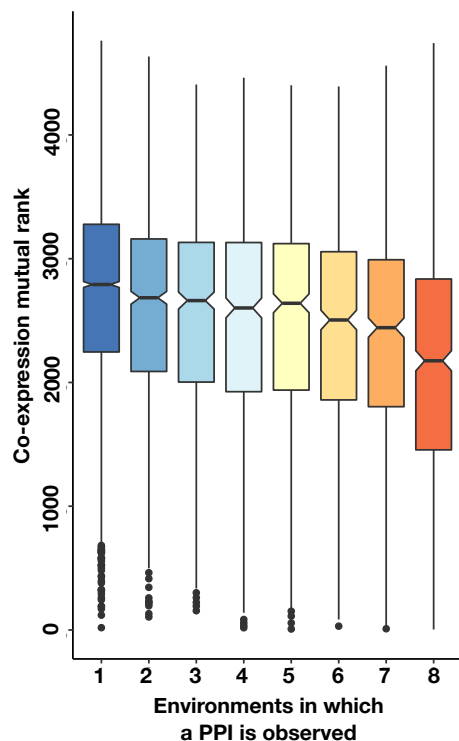**B**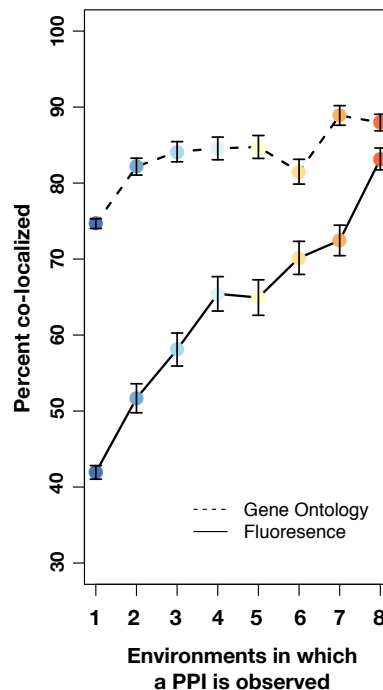**C**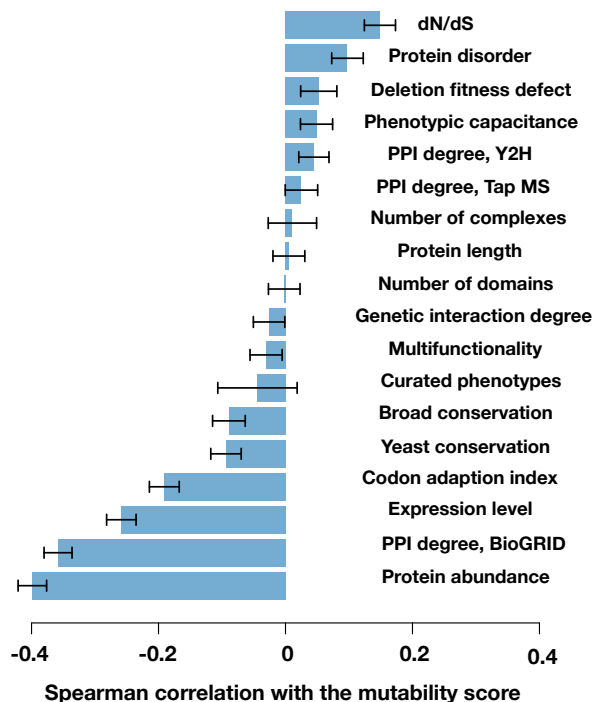**D**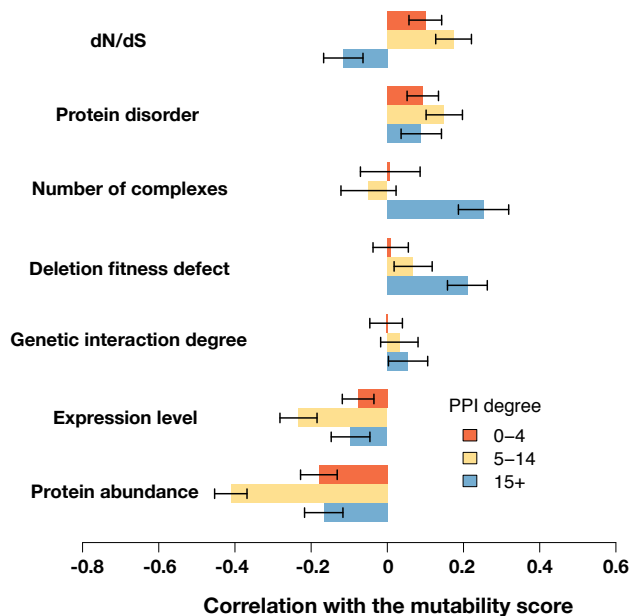

Supplement: supp [file elife-62365-supp-v1.zip › elife_poa_e62365_Figure_4_figure_supplement_3.pdf]

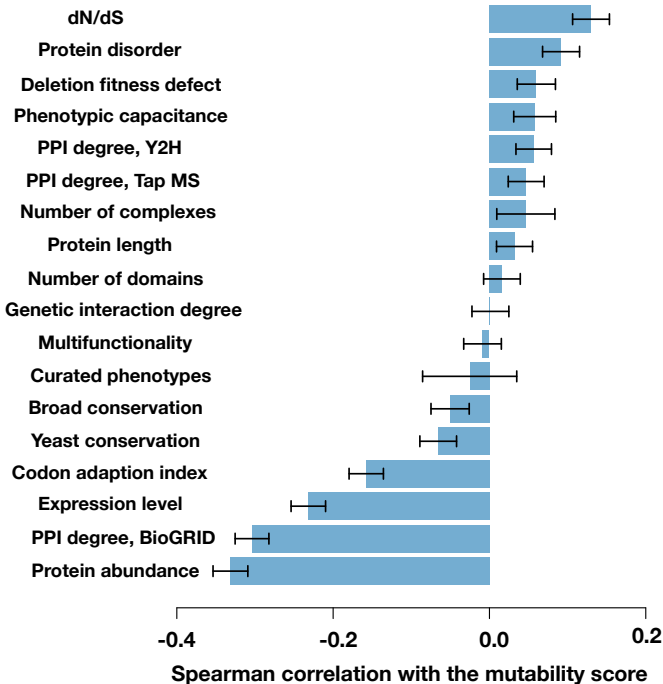

Supplement: supp [file elife-62365-supp-v1.zip › elife_poa_e62365_Figure_4_figure_supplement_4.pdf]

**A**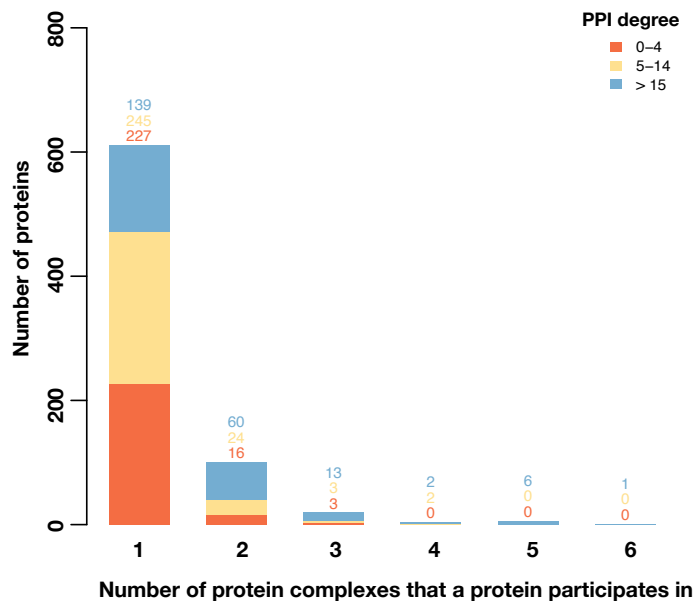**B**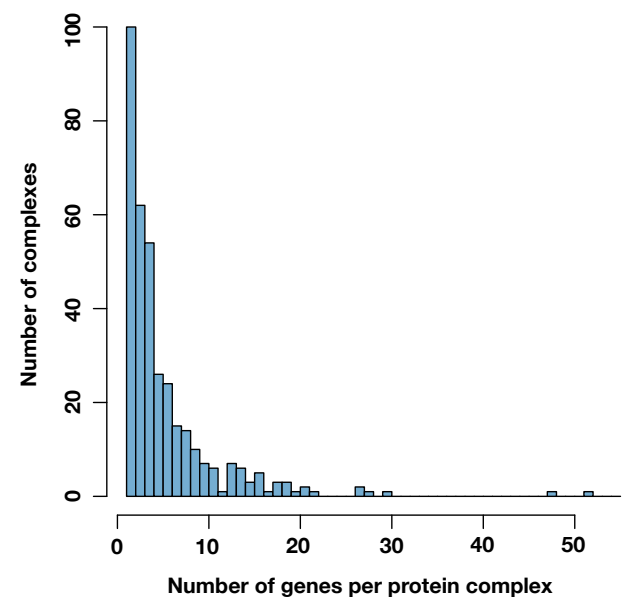**C**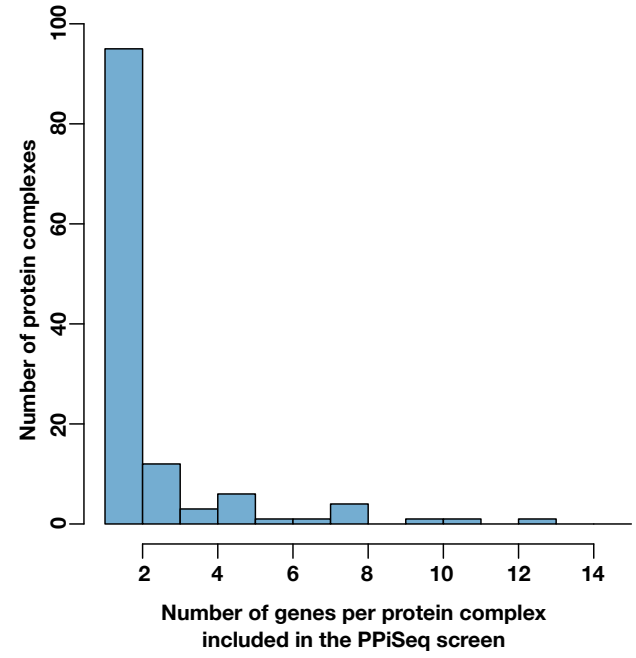

Supplement: supp [file elife-62365-supp-v1.zip › elife_poa_e62365_Figure_4_figure_supplement_5.pdf]
